1 Ecological divergence of DNA methylation patterns at distinct spatial scales

2

3 H. De Kort<sup>1\*</sup>, B. Panis<sup>2</sup>, D. Deforce<sup>3</sup>, F. Van Nieuwerburgh<sup>3</sup>, O. Honnay<sup>1</sup>

4 \* Correspondence to: [hanne.dekort@kuleuven.be](mailto:hanne.dekort@kuleuven.be)

5

6

7 <sup>1</sup> Plant Conservation and Population Biology, University of Leuven, Kasteelpark Arenberg 31-2435,

8 BE-3001 Leuven, Belgium.

9 <sup>2</sup> Bioversity International, K.U. Leuven, 3001 Leuven, Belgium

10 <sup>3</sup> Laboratory of Pharmaceutical Biotechnology, Ghent University, Ghent, Belgium

11

12

13 **Key-words:** Phenotypic plasticity, non-genetic inheritance, DNA methylation, anticipatory maternal

14 effects, landscape genetics, epigenetic polymorphisms, SMPs

15 **ABSTRACT**

16 Adaptive trait divergence between populations is regulated by genetic and non-genetic processes.  
17 Compared to genetic change, epigenetic change is unstable and short-lived, questioning its  
18 contribution to long-term adaptive potential. However, epigenetic change can accumulate over  
19 time, and may result in beneficial epigenetic memories where environments are heterogeneous.  
20 Diverging epigenetic memories have been observed across large spatial scales, and can persist  
21 through multiple generations even in the absence of the causative environmental stressor. It is  
22 unknown, however, how and to what extent epigenetic memories contribute to fine-scale  
23 population structure and evolution. Here, we performed whole genome bisulfite sequencing on 30  
24 *Fragaria vesca* F1 plants originating from distinct ecological settings and grown in a controlled  
25 environment. Specifically, we compared methylation patterns between a steep, altitudinal gradient  
26 (<2 km) and a wide spatial gradient (>500 km). If epigenetic variation is random, arising from errors  
27 during replication and without evolutionary implications, one would expect similar amounts of  
28 epigenetic variation across populations and no spatial scale-effect. Here, we find that epigenetic  
29 memories arise even at fine spatial scale, and that both parallel and non-parallel biological processes  
30 underpin epigenetic divergence at distinct spatial scales. For example, demethylation of  
31 transposable elements consistently occurred at the large but not the small spatial scale, while  
32 methylation differentiation for most biological processes were shared between spatial scales. Acute  
33 drought stress did not result in significant epigenetic differentiation, indicating that repeated  
34 historical stress levels associated with heterogeneous environmental conditions are required for  
35 acquiring a stable epigenetic memory and for coping with future environmental change.

## 36 INTRODUCTION

37 Adaptive genetic variation underlying fitness traits is considered the dominant resource upon which  
38 plants depend for evolving under environmental change. Driven by drift, mutation and migration,  
39 such genetic variation supplies populations with trait values that support local fitness and adaptive  
40 potential. However, although it is widely assumed that adaptive phenotypic variation is mainly  
41 regulated by the underlying genetic architecture, only small proportions of the total phenotypic  
42 variation observed in many species have been associated with genetic variants (Krishna Kumar *et al.*  
43 2016; Wellenreuther & Hansson 2016; Resende *et al.* 2017). The remaining phenotypic variation,  
44 typically referred to as missing heritability, can be roughly attributed to (i) the detection limits of  
45 rare genetic variants and genetic interactions, and (ii) heritable epigenetic variation (Brachi *et al.*  
46 2011; Miska & Ferguson-Smith 2016; Whipple & Holeski 2016; Gienapp *et al.* 2017; Banta & Richards  
47 2018).

48 The role of epigenetic variation in governing adaptive evolution remains controversial, yet a growing  
49 body of literature demonstrates the ubiquity of transgenerational epigenetic transmission, and  
50 consequently considers it as a key evolutionary force (Gugger *et al.* 2016; Miska & Ferguson-Smith  
51 2016; Lind & Spagopoulou 2018; Schmid *et al.* 2018; Zhang *et al.* 2018; Danchin *et al.* 2019). Non-  
52 random epigenetic variation has been shown to be widespread in natural populations, and to co-  
53 vary with a range of environmental stressors, including herbivory, drought, salt and temperature  
54 (Foust *et al.* 2016; Jeremias *et al.* 2018; Alonso *et al.* 2019; Gáspár *et al.* 2019). While most stress-  
55 induced methylation changes are reset to basal levels after stress relief, part of these modifications  
56 can be stably inherited across mitotic and even meiotic cell divisions (Chinnusamy & Zhu 2009; Crisp  
57 *et al.* 2016). Such a somatic or transgenerational epigenetic stress memory allows plants to cope  
58 more effectively with subsequent stresses, thus evoking considerable fitness benefits in  
59 heterogeneous environments (Crisp *et al.* 2016; Hilker *et al.* 2016). Unraveling the relative extent of  
60 intra-generational epigenetic change resulting from acute environmental stress vs. transgenerational

61 epigenetic accumulation may contribute to our understanding of how plants rely on their epigenetic  
62 machinery for coping with environmental change.

63 How selection pressures affect genome-wide DNA methylation levels in natural population remains  
64 poorly explored in non-model organisms, but considerable advances have been made in *Arabidopsis*  
65 *thaliana*. A study involving genome-wide DNA methylation analysis of 122 *A. thaliana* accessions  
66 sampled across Eurasia showed that climate characteristics most abundantly co-varied with  
67 methylation levels of cytosines in CHH context (where H represents a G, T or A nucleotide), with CHH  
68 methylation typically indicating the involvement of transposable elements (TEs) (Keller *et al.* 2016).  
69 These findings could be related to natural selection at the level of TE-specific methyltransferase  
70 genes that facilitate demethylation of transposons when temperatures reach extreme levels, or  
71 where populations are genetically impoverished. Stress-induced demethylation of transposons  
72 boosts transposon activity and subsequent genetic change, paving the way for rapid genetic  
73 replenishment and adaptation to environmental stressors (Mirouze & Paszkowski 2011; Ito *et al.*  
74 2016; Rey *et al.* 2016; Schrader & Schmitz 2019). The strongest associations between climate and *A.*  
75 *thaliana* methylation levels were, however, found in CG contexts within or near genes related to  
76 abiotic stress responses, development and reproduction (Keller *et al.* 2016). Because (i) DNA  
77 methylation has been shown to be meiotically most stable in the CG context, and (ii) the majority of  
78 reported heritable epi-mutations occurs at CG sites (Mathieu *et al.* 2007; Jiang *et al.* 2014; Stassen *et*  
79 *al.* 2018), climate-CG methylation associations most likely represent solid adaptive signals. A recent  
80 study corroborated the evolutionary relevance of CG methylation using a multi-generational *A.*  
81 *thaliana* selection experiment, demonstrating that (i) methylation of differentially methylated  
82 cytosines (DMCs) was significantly higher in CG context after five generations of selection, (ii) the  
83 majority of these DMCs were stably inherited for 2 or 3 generations following the selection  
84 experiment, (iii) selection caused overall reductions in epigenetic diversity, and (iv) methylation  
85 levels of some CG DMCs were associated with phenotypic changes (Schmid *et al.* 2018).

86 Genome-wide DNA methylation studies in *Quercus* species showed patterns similar to those  
87 obtained in *A. thaliana*: DMCs associated with climate dominate in CG context, and these DMCs  
88 occur in or near genes (Platt *et al.* 2015; Gugger *et al.* 2016). Using the experimentally more versatile  
89 herb *Plantago lanceolata* as a study organism, Gáspár *et al.* (2019) demonstrated that much of the  
90 environment-related epigenetic variation is maintained in an F1 common garden. Thus, at least part  
91 of the epigenetic variation observed in the field is stable, non-random and of ecological significance.  
92 Although these studies considerably increased our understanding of how epigenetic variation is  
93 distributed across large spatial scales, it remains unknown to what extent epigenetic variation  
94 contributes to population divergence along small-scale environmental gradients, where the interplay  
95 between migration, drift and selection can be extremely dynamic (Richardson *et al.* 2014). Highly  
96 heterogeneous environments may thus give rise to distinct signatures of epigenetic variation.

97 Evidence is accumulating that an epigenetic memory may be particularly beneficial where genetic  
98 diversity is in short supply, e.g. following demographic bottlenecks or in clonal plant species (Latzel  
99 *et al.* 2016; Ardura *et al.* 2017; Artemov *et al.* 2017; Thorson *et al.* 2017; Rendina González *et al.*  
100 2018; Wibowo *et al.* 2018). More fundamentally, Dapp *et al.* (2015), using epigenetic inbred lines of  
101 *Arabidopsis thaliana*, demonstrated that epigenetic diversity can drive hybrid vigour in the absence  
102 of genetic diversity. Thus, epigenetic variation may be a crucial element of population persistence  
103 where evolutionary trajectories or life history traits limit genetic diversity. Study systems combining  
104 strong evolutionary pressure (e.g. expansion fronts or heterogeneous environments) and life history  
105 traits that constrain genetic diversity (e.g. asexual reproduction and high levels of self-compatibility)  
106 are therefore promising for obtaining more insights in the role of epigenetic variation in adaptation  
107 and population persistence.

108 Here, we explore genome-wide epigenetic profiles of F1 plants originating from three natural  
109 *Fragaria vesca* populations that were found to harbor strong natural differentiation in terms of traits  
110 related to fitness, most likely driven by local topography impacting local soil moisture levels (De Kort

111 *et al. 2019*). Among the most notable patterns observed in a controlled common garden  
112 environment were that plants adapted to the stressful conditions at high altitudinal, south-oriented  
113 locations were small and produced less flowers than plants originating from low altitudinal, north-  
114 oriented locations (*De Kort et al. 2019*). *F. vesca* has also been shown to harbor limited genetic  
115 diversity across its range (*Hilmarsson et al. 2017*), presumably as a result of its life history (self-  
116 compatible and clonal). Due to this limited genetic diversity in combination with pronounced  
117 altitude-dependent phenotypic divergence, we hypothesize substantial adaptive epigenetic signals  
118 coinciding with increased stress levels along the studied altitudinal gradient (Fig. 1C). We specifically  
119 answer the following questions: (i) do epigenetic memories diverge with altitude, and does  
120 methylation increase or decrease with increasing altitude?; (ii) are these small-scale genome-wide  
121 methylation patterns comparable to those obtained at a much larger spatial scale (>500 km)?; (iii)  
122 are altitudinal DMCs enriched for ecologically relevant gene ontology terms?; and (iv) does acute  
123 drought stress induce a detectable epigenetic memory?

## 124 **METHODS**

### 125 **Sample collection**

126 Seeds were collected from five plants at (i) three nearby locations in the French Pyrenees, (ii) one  
127 location in the French Vosges, and (iii) one location in Poland (Fig. 1). After germination, one  
128 seedling per mother plant was randomly selected from every location and grown in humid soil. To  
129 compare the magnitude of inherited epigenetic memories to intra-generational epigenetic change  
130 acquired through acute drought stress, an additional seedling per mother plant was raised for the  
131 mid-altitudinal Pyrenean plants, and these seedlings were subjected to reduced soil moisture levels  
132 starting two months after germination. Specifically, watering stopped until leaves went limp, and  
133 this process was repeated consecutively for four weeks, after which the plants were allowed to  
134 rehydrate during one week to remove most drought-induced epigenetic effects that do not result in

135 a relatively stable epigenetic memory. DNA was then extracted from one leaf per plant, resulting in  
 136 30 samples (Fig. 1).

137

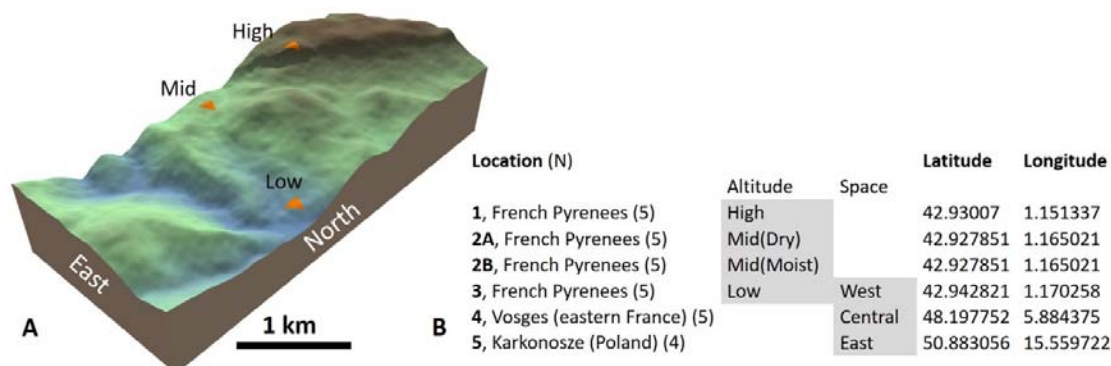

138  
 139 **Fig. 1.** Geographical location of altitudinal WGBS samples (A,B) and of the broader spatial WGBS (B). Samples  
 140 originate from south western France (Pyrenees), eastern France (Vosges) and south western Poland  
 141 (Karkonosze). N represents the number of successfully sequenced samples (one Polish sample failed post-  
 142 sequencing quality checks). Samples from location 2 are used for comparisons within the altitudinal gradient  
 143 (Mid) as well as between the soil moisture treatments (Dry vs. Moist). Samples from location 3 are used for  
 144 comparisons within the altitudinal (Low) as well as the spatial (West) gradient. High, mid and low altitude  
 145 correspond to 1200, 750 and 450 meter asl, resp.

#### 146 **Whole genome bisulfite sequencing and DMC calling**

147 DNA of 30 freeze-dried samples was extracted with a QIAGEN kit. Up to 200ng of DNA was  
 148 fragmented to 400bp with a Covaris S2 sonicator prior to whole-genome library preparation  
 149 (NEBNext Ultra II kit), ligation of methylated adaptors and size selection on 2% E-gel (450-650 bp).  
 150 Bisulfite conversion was performed using the EZ DNA methylation gold kit (Zymo Research, Irvine,  
 151 CA, USA). An enrichment PCR was performed using KAPA Hifi hotstart Uracil+ mastermix in a 12  
 152 cycles PCR reaction. Paired-end 75 bp sequencing of the library fragments was performed on eight  
 153 lanes of an Illumina HiSeq4000 sequencer, generating  $76,417,704 \pm 13,837,490$  reads (mean  $\pm$   
 154 standard deviation) per sample. An extensive quality control was performed on the sequencing data  
 155 using FastQC version 0.11.5 (Babraham Bioinformatics), showing a mean quality value across each  
 156 base position in the reads, average quality scores of the reads and average GC content of reads that  
 157 is to be expected from a high-quality Illumina sequencing run (see Supporting Figs. 1-5 for quality  
 158 and coverage stat). Trimmomatic (Bolger et al. 2014) version 0.36 was used to trim reads for

159 sequences with a Phred score lower than 33 and sequences corresponding to Illumina TruSeq  
160 adapters. Sequences shorter than 50bp after trimming were discarded. One sample from Poland  
161 (“East”) showed an increased level of duplicate reads and was excluded from further analysis  
162 (Supporting Fig. 3).

163 FastQ Screen version 0.11.1 (Babraham Bioinformatics) was used to check whether the library is  
164 consisting of *F. vesca* genomic sequences to rule out contamination with DNA originating from  
165 genomes of other species. The trimmed reads were mapped against the *Fragaria vesca*\_v4.0.a1  
166 genome using bismark version 0.17.0. (Krueger and Andrews 2011). One sample from Poland  
167 (“East”) showed suspicious duplication levels and was expelled from further analysis (see Supporting  
168 Figs. 1-5 for quality and coverage stats). Average sequencing depth after mapping and deduplication  
169 was 30x.

170 The resulting mapped dataset was used for downstream analyses using R package methylKit version  
171 1.10.0 (Akalin *et al.* 2012). Only CpGs with at least 5x coverage in at least 3 samples per group were  
172 retained (Walker *et al.* 2015; Wan *et al.* 2016). To reduce bias due to outlier depth, bases with a read  
173 depth above the 99.9th percentile of coverage are filtered out. The filtered data were used to test  
174 for differentially methylated CpGs (DMCs), considering a 25% difference and q-values <0.01 as  
175 significant. Significant differentially methylated cytosines (DMCs) were identified between (i) low,  
176 mid and high altitudinal samples (hereafter “altitudinal DMCs”), (ii) the three distance European  
177 samples (hereafter “spatial DMCs”), and (iii) the two soil moisture treatments (hereafter “drought  
178 DMCs”).

### 179 **Methylation profiling of topography, space and drought**

180 All DMCs were assumed to be ecologically divergent (i.e. resulting from drift or fitness differences).  
181 Because the epigenetic signals observed here have persisted in the second generation (F1), they may  
182 represent stable epigenetic changes. However, because we cannot corroborate the long-term  
183 transgenerational stability of these DMCs, we further refer to ecological rather than evolutionary  
184 divergence of methylation patterns. Cytosines that were significant along the altitudinal gradient,



185 were thus considered to be ecologically divergent and potentially adaptive. On the other hand,  
186 spatially divergent cytosines that were not significant along the altitudinal gradient, were assumed  
187 to be ecologically neutral along the altitudinal gradient. Similarly, the altitudinal DMCs that were not  
188 significant along the spatial gradient were assumed to be neutral along the spatial gradient, while  
189 spatial DMCs were considered divergent and potentially adaptive along the spatial gradient. The  
190 drought DMCs were not significant along the two gradients and were thus considered neutral along  
191 both gradients.

192 As a measure of epigenetic structure (ES), a principal component analysis (PCA) was performed to  
193 reveal to what extent DMCs clustered samples according to topography, space and drought. As a  
194 measure of epigenetic diversity (ED) that is insensitive to sample size (Vellend *et al.* 2010; Schmid *et*  
195 *al.* 2018), we calculated the average pairwise methylation difference between the five individuals  
196 originating from each location. High ED thus reflects high variation in the degree of methylation  
197 within a population. Because ED represents a proportion, a quasibinomial model (logit link) was used  
198 to test whether ED differs significantly between populations. The resulting effect size ( $R^2$ ) was  
199 estimated using the R package “Rsq” (default function), and pairwise comparisons were assessed  
200 Tukey-wise (R package “Multcomp”). Methylation shifts, ED and ES were examined for ecologically  
201 neutral and potentially adaptive DMCs separately.

## 202 **DMC enrichment analysis**

203 Gene ontology terms (GOs) were retrieved from the Genome Database for Rosaceae (GDR, Jung *et*  
204 *al.* 2019). To test which biological processes were overrepresented in sequences containing DMCs  
205 (as compared to the full *F. vesca* genome), we performed a Fisher’s exact test with FDR correction as  
206 implemented in OmicsBox, using altitudinal DMC GOs as test data and *F. vesca* GOs as reference  
207 data. The same analysis was performed for the spatial DMCs, and in CG and non-CG context  
208 separately.

209 To address the role of non-CG methylation in transposon regulation, we aligned genes in which we  
210 found one or more DMCs to all transposable elements known in *F. vesca*, using the GDR search  
211 function. Specifically, we extracted all genes related to the keyword “transpos” (referring to. e.g.  
212 transposase, transposon, transposable element).

## 213 RESULTS

214 Apart from slight increases in genome-wide methylation levels from high to low soil moisture, and  
215 from east to west (Supp. Fig. 6), no systematic genome-wide differences in methylation were  
216 observed between the 29 samples. This suggests that the environmental conditions historically  
217 encountered by our *F. vesca* populations target specific genomic regions or cytosine sites. We  
218 accordingly detected a total of 82 839, 699 and 23 DMCs along the spatial gradient, the altitudinal  
219 gradient and between the soil moisture treatments, respectively (Supp. Table 1). These DMCs often  
220 clustered together in genomic islands of differential methylation (Fig. 1, Fig. 2A). A Mann-Whitney U-  
221 test confirmed this clustering, showing that DMCs in all sequence contexts were significantly more  
222 proximate to one another than expected based on the genome size (240 Mbp) and on the genome-  
223 wide number of DMCs (varying from 13 altitudinal DMCs in CG context to 51135 spatial DMCs in CG  
224 context) (Supp. Fig. 7, Supp. Table 2).

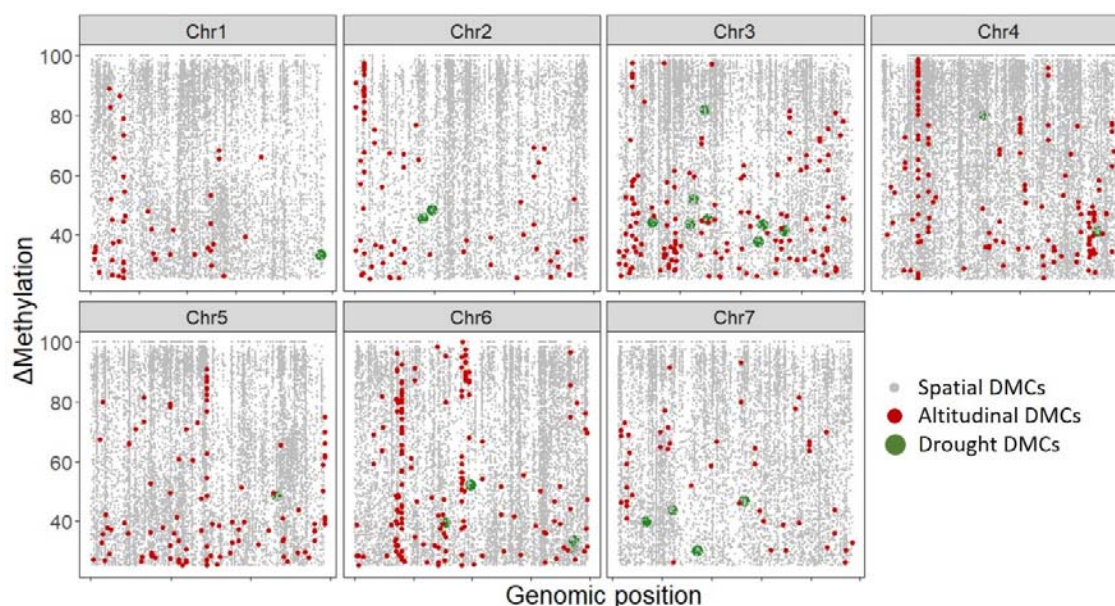

225

226 **Fig. 1. Genome-wide differentiation in methylation** for the DMCs detected along the spatial gradient (grey),  
227 along the altitudinal gradient (red), and between soil moisture treatments (green).

228 Methylation divergence was most pronounced along the spatial gradient, followed by the altitudinal  
229 gradient and the soil moisture treatments (Fig. 2B). A total of 59 altitudinal DMCs (8.5%) were also  
230 significantly divergent along the spatial gradient, and another 153 altitudinal DMCs (21.9%) were  
231 located within 500 bp of a spatial DMC, indicating shared methylation patterns among distinct  
232 spatial scales. The negligible proportion of genome-wide cytosines that was differentially methylated  
233 between soil moisture treatments suggests that short-term acute soil dryness does not constitute a  
234 pronounced epigenetic memory.

235 DMC density profiles were substantially different between the altitudinal gradient, the spatial  
236 gradient and the soil moisture treatments (Fig. 2C-E). For altitudinal DMCs, the most dominant shift  
237 in methylation was observed in CG context, with substantial methylation gain as altitude increased  
238 (Fig. 2C). However, the most extreme shifts in DMC methylation level (i.e. toward 100% methylation  
239 loss or gain) was observed along the spatial gradient (Fig. 2D). Thus, fixation of methylation patterns  
240 occurred both at small and large spatial scale, but was more frequent along the spatial gradient.

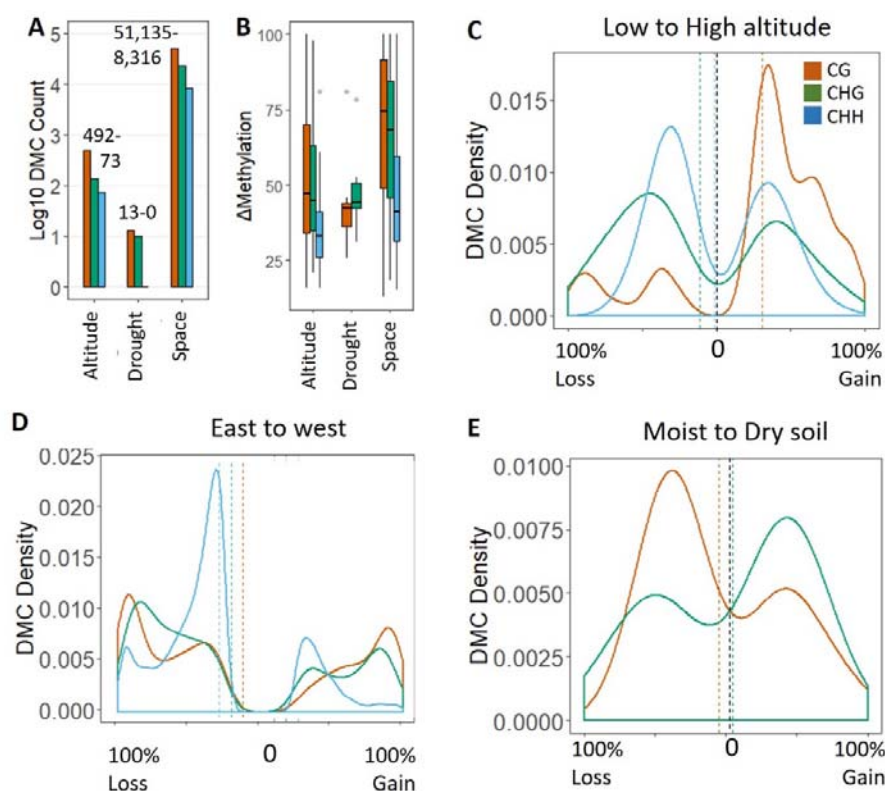

241

242

243 **Fig. 2. Distribution of methylation patterns among the studied gradients**, including DMC counts (A), DMC  
 244 differentiation (B), and DMC density of change in methylation level along the topographical gradient (C), the  
 245 spatial gradient (D) and between soil moisture treatments (E). All patterns were visualized for each sequence  
 context separately (CG in orange, CHG in green and CHH in blue).

246

247 A total of 247 out of 698 DMCs (35.4%) systematically gained (113 CG, 21 CHG and 20 CHH) or lost  
 248 (38 CG, 35 CHG and 20 CHH) methylation from low to high altitude. Methylation gains along the

248

249 altitudinal gradient thus predominantly occurred in the CG context (see also Fig. 2C). Along the  
 250 spatial gradient, a total of 56 795 out of 82 839 DMCs (68.6%) systematically lost (18 099 CG, 8731

250

251 CHG and 3609 CHH) or gained (17 038 CG, 7680 CHG and 1638 CHH) methylation from east to west  
 252 (see also Fig. 2D). The plants from western Europe thus particularly differ from central Europe in the

252

253 amount of demethylating CHH sites. Given that the plants raised here were genetically variable, we  
 254 assume that the observed drastic and systematic shifts in methylation from low to high altitude and

254

255 from east to west are (i) not solely driven by genetic differences, and/or (ii) underpinned by epistatic  
 effects.

256 Methylation patterns grouped the plants according to their location of origin (Fig. 3, Supp. Table 3),  
257 thus convincingly indicating that diverging methylation levels persisted through the F1 generation.  
258 Our results further show that neutrally behaving cytosines can align with spatial organization,  
259 particularly at large spatial scales (Fig. 3B, 3D), as expected under isolation-by-distance. This finding  
260 is concordant with the behavior of neutral genetic markers that spatially cluster as a result of drift or  
261 gene flow. Clustering was more pronounced for adaptive than for neutral DMCs (Fig. 3A, 3C),  
262 indicating epigenetic isolation-by-ecology.

263

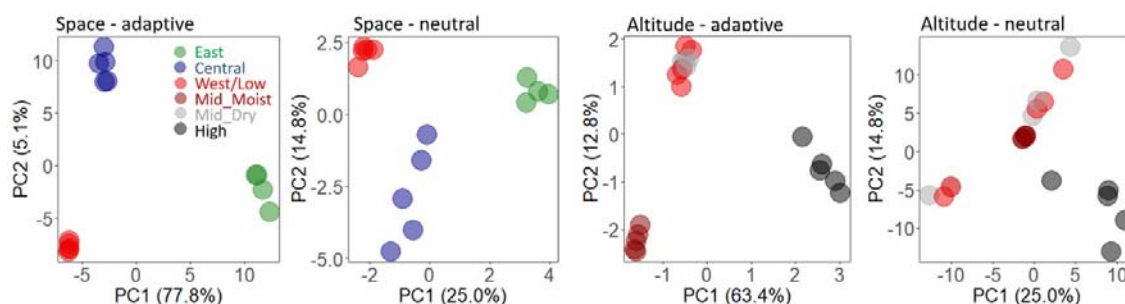

264

265 **Fig. 3. Principal components analysis** of methylation levels at large and small spatial scale, and for ecologically  
266 neutral vs. potentially adaptive methylation marks. See supporting Table 3 for eigenvalues and variable  
267 contributions.

268 Adaptive epigenetic diversity (ED) significantly increased from low to high altitude in CG context, but  
269 not in non-CG context (Fig. 4A-B, Supp. Table 4). There also was a significantly lower adaptive ED in  
270 the west than in the mid-center and east of the sampling area, both in CG and non-CG context (Fig. 4A-B,  
271 Supp. Table 4). As opposed to adaptive ED, neutral ED did not significantly change with altitude or  
272 space (Fig. 4C-D, Supp. Table 4).

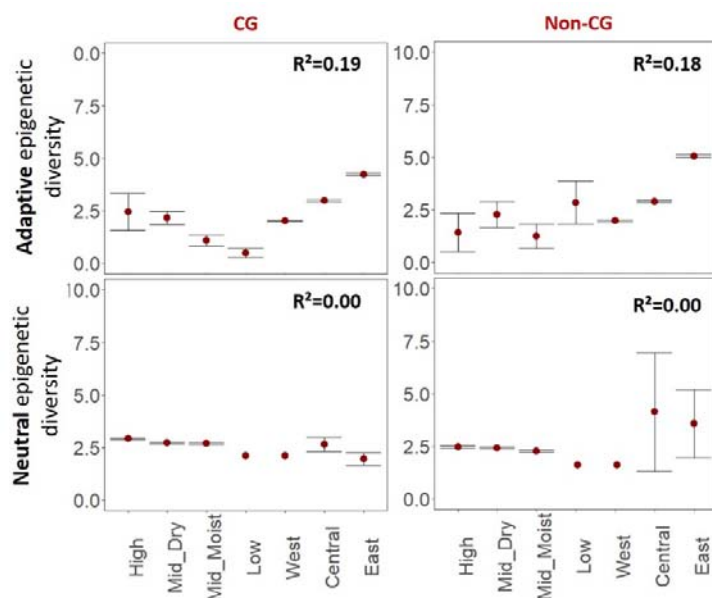

273  
274 **Fig. 4. Epigenetic diversity (ED)** for ecologically neutral vs. putatively adaptive methylation, both in CG and  
275 non-CG context. Effect sizes are shown as  $R^2$  retrieved from generalized linear models testing for differences in  
276 ED between locations. Error bars represent 95% confidence intervals of the means. See Supp. Table 4 for  
277 corresponding statistics.

278 Out of 138 and 25 GO terms that were associated with the altitudinal DMCs in CG and non-CG  
279 context, respectively, 54 (39.1%) and 2 (8.0%) were significantly enriched in comparison to the full *F.*  
280 *vesca* GO compilation (Supp. Table 5, 6). A similar proportion of enriched GO terms was observed for  
281 the spatial DMCs in CG context (39.7%, i.e. 578 out of 1456 GOs). As opposed to the altitudinal  
282 DMCs, however, a high proportion of enriched GOs was also found in non-CG context (48.0%, i.e.  
283 290 out of 604 GOs).

284 DMCs in CG vs. non-CG context represented a distinct set of enriched biological processes (Fig. 5).  
285 Where non-CG DMCs were particularly enriched for regulatory functions (e.g. regulation of gene  
286 expression and protein dephosphorylation), biological processes more directly related to  
287 environmental stressors were overrepresented only in CG-context (e.g. circadian rhythm, antibiotic  
288 metabolism and response to light). GOs related to cell division and reproduction (e.g. spindle  
289 organization and sexual reproduction) were enriched in both CG and non-CG DMCs. No pronounced  
290 differences in GO composition were found between altitudinal and spatial DMCs, and most  
291 altitudinal GOs (69%) were also part of the spatial GO distribution (Supp. Table 5).

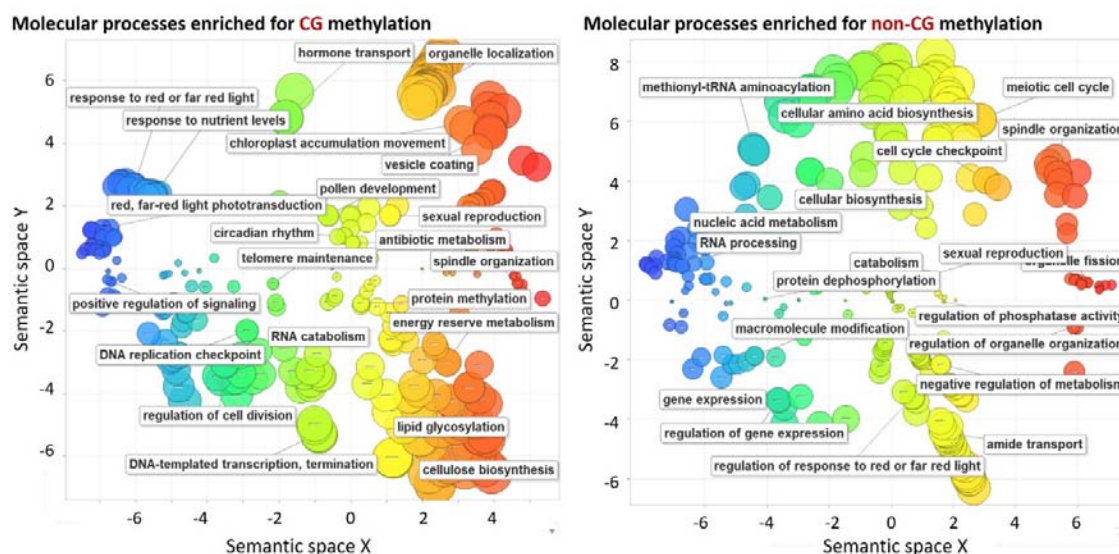

292  
 293 **Fig. 5. GO enrichment graphs** showing the significantly enriched GO terms in CG (Left) and non-CG context for  
 294 the spatial DMCs. Terms were visualized using REVIGO (Supek *et al.* 2011), which cluster GO terms according  
 295 to their semantic similarities (e.g. response to abiotic stimulus and response to stimulus are clustered  
 296 together). In each cluster, one or two GOs representing their corresponding cluster are shown. These graphs  
 297 represent enrichment in spatial DMCs. Please see Supp. Table xx for GOs enriched in altitudinal DMCs.

298 A total of 31 transposable elements were found to contain one or more DMCs (Supp. Table 1). The  
 299 most heavily differentiated transposon harbored no less than 21 DMCs, of which 15 in non-CG and 6  
 300 in CG context. All but one differentially methylated transposon were found at the large spatial scale,  
 301 and were dominated by DMCs in non-CG context (Fig. 6). On average, transposon DMCs lost 18%  
 302 and 32% of methylation from east to west in CG and non-CG context, respectively.

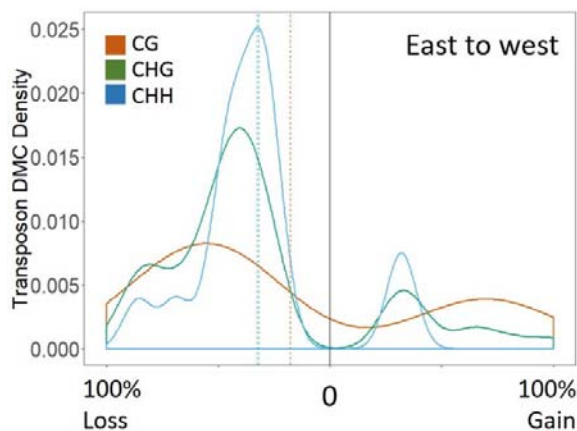

303  
 304 **Fig. 6.** DMC density plot showing methylation gain and loss for transposable elements, in CG, CHG and CHH  
 305 context.

306

307 **DISCUSSION**

308 Epigenetic variation in natural populations probably is key to their survival, particularly when they  
309 are genetically depleted and environmentally challenged. In such systems, it may be favorable for  
310 individuals to acquire an epigenetic memory that allows efficient responses to fluctuating  
311 environmental stressors. Here, we shed light on the prevalence of natural epigenetic variation along  
312 a steep environmental gradient, and put these findings into a much wider geographical context.  
313 Collectively, our results indicate that epigenetic memories develop both at small and large spatial  
314 scales, each associated with distinct epigenetic signatures. Specifically, methylation in non-CG  
315 context gains in importance as the spatial scale increases, and this translates into more methylation  
316 differentiation of regulatory sequences and transposable elements. Conversely, divergence of CG  
317 methylation was more pronounced at the fine-scale altitudinal gradient, where it may guide  
318 adaptive gene expression in response to environmental variability.

319 We found that epigenetic memories, predominantly in CG context, can diverge even at very small  
320 spatial scale (< 2 km), indicative of epigenetic isolation-by-ecology. This finding is in strong contrast  
321 to an earlier study that was unable to detect significant epigenetic differences between alpine herb  
322 populations originating from three elevations and grown in a common garden using 150  
323 methylation-sensitive AFLPs (MS-AFLPs) (Nicotra *et al.* 2015). In our study, methylation in CG-  
324 context increased from low to high altitude, suggesting that high altitudinal environments trigger  
325 activation of genes predominantly underpinning amino acid metabolism, intracellular transport,  
326 responses to light conditions and cellulose catabolism (Supp. Table 6). Furthermore, we observed a  
327 pronounced increase in epigenetic diversity for CG DMCs from low to high altitude, suggesting that  
328 epigenetic diversity for ecologically adaptive methylation sites may be favorable where the  
329 environment is more heterogeneous. While evidence supporting DNA methylation differentiation in  
330 response to environmental heterogeneity is still lacking, several lines of evidence have  
331 demonstrated increased up-regulation of genes involved in environmental responses to novel  
332 and/or stressful conditions through gene body methylation (Artemov *et al.* 2017; Dixon *et al.* 2018).



333 Fine-scale epigenetic patterns differed substantially from large-scale epigenetic patterns. As  
334 compared to the fine-scale altitudinal gradient, the large spatial gradient was featured by (i) an  
335 increase in the number of DMCs with two orders of magnitude, (ii) more intense methylation  
336 differentiation (on average 70% vs. 40%), (iii) a more prominent role for non-CG differentiation and  
337 differential transposon suppression, and (iv) more pronounced population structure, particularly for  
338 ecologically adaptive DMCs. Although the CG-context constituted the most divergent methylation  
339 patterns irrespective of spatial scale (Fig. 2), the proportion of non-CG DMCs increased considerably  
340 from small to large spatial scale (Fig. 2D). This finding is in agreement with a large-scale study on *A.*  
341 *thaliana* showing that non-CG demethylation associated with transposon activity was abundant  
342 where temperature reached extreme levels (Keller *et al.* 2016). It is unclear, however, whether  
343 transposon activity was more related to temperature extremes than to demographic history and  
344 range dynamics, given that highest transposon activity was observed at *A. thaliana*'s range edges  
345 where its distribution becomes more scattered (Beck *et al.* 2008; Alonso-Blanco *et al.* 2016). Here,  
346 non-CG DMCs lost methylation and were less diverse (Fig. 4, 6) from east to west, which,  
347 hypothetically, results from ecology-driven activation of transposons towards the edge of the  
348 distribution range of *F. vesca* (defined by the Pyrenees in the southwest of its distribution), where  
349 transposon activation through demethylation may provide opportunities for genetically  
350 impoverished populations to boost genetic change. Although this would be in line with earlier  
351 studies pointing to an evolutionary rescue mechanism for transposons during range expansions  
352 (Stapley *et al.* 2015; Rey *et al.* 2016b), more research on the spatial distribution of transposon  
353 activity and its role in evolution is required to validate this assumption. Nevertheless, the  
354 observation that transposons are differentially suppressed at large spatial scale and not along a fine-  
355 scale steep gradient, suggests that differential suppression of transposon activity follows  
356 biogeographic storylines rather than fine-scale environmental clines.

357 The more pronounced epigenetic clustering for neutrally behaving cytosines along the spatial  
358 gradient than along the altitudinal gradient (Fig. 3) may suggest epigenetic isolation-by-distance

359 (Whipple & Holeski 2016). However, most clustering occurred at putatively adaptive DMCs indicating  
360 a more dominant role for isolation-by-ecology over isolation-by-distance. Given that roughly 30% of  
361 altitudinal DMCs were shared with the spatial DMCs, part of the adaptive epigenetic divergence  
362 along both spatial scales may be driven by parallel ecological processes. This spatial ecological  
363 parallelism underlying methylation patterns is corroborated by the strong overlap in enriched gene  
364 ontology processes between both spatial scales (Fig. 5, Supp. Table 5, 6).

365 While the origin-dependent epigenetic memories (i.e. altitudinal and spatial DMCs) were stably  
366 transmitted to the F1 generation, acute drought stress-induced epigenetic signatures were weak  
367 (Fig. 1,2). This suggests that repeated exposure to stressful conditions is required for acquiring a  
368 detectable epigenetic memory, and emphasizes the importance of historical stress experience for  
369 the generation of an epigenetic memory. Vice versa, our results suggest that the loss of an  
370 epigenetic memory requires long-term release of stressful conditions, and that multiple generations  
371 without stress exposure are required for completely resetting the epigenetic machinery. Multi-  
372 generational persistence of epigenetic signatures (i.e. epigenetic carryover) and thus slow trans-  
373 generational loss of epigenetic memory is a typical epigenetic mechanism observed in common  
374 gardens quantifying epigenetic variation across generations (Paszkowski & Grossniklaus 2011; Miska  
375 & Ferguson-Smith 2016; Proulx *et al.* 2019). Given the natural ubiquity of transgenerational  
376 epigenetic inheritance, at least part of the epigenetic patterns observed in our F1 generation is  
377 expected to reflect such epigenetic carryover. Nevertheless, the precise extent of multi-generational  
378 methylation inheritance requires additional generations of epigenetic profiling.

379 Collectively, our findings provide novel insights into the natural prevalence of adaptive epigenetic  
380 divergence and the processes driving epigenetic memories at distinct spatial scales. We showed that  
381 significantly different epigenetic memories, presumably concentrated in or near gene bodies, arise  
382 at fine spatial scales. At large spatial scale, epigenetic memories also diverge at the level of  
383 regulatory sequences and transposons. We hypothesize that genetic and epigenetic responses

384 complementary support fitness in heterogeneous environments, and that non-CG demethylation  
385 increases in importance as genetic variation gets depleted. Further research involving higher  
386 resolution sampling and a multi-generational common garden is required to shed more light on the  
387 role of epigenetic variation at distinct spatial scales. This would particularly increase our  
388 understanding of epigenetic memory acquisition and divergence as an adaptive strategy of natural  
389 populations that could enhance their ability to cope with global change stressors.

390 **ACKNOWLEDGEMENTS**

391 HDK holds a postdoctoral fellowship funded by FWO (Research Foundation Flanders, 12P6517N). Dr.  
392 Kenny Helsen and Kasper Van Acker helped raising the plants. Dr. Martin Diekmann and Josef Müller  
393 took care of the sampling in Poland.

394

395 **AUTHOR CONTRIBUTIONS**

396 HDK coordinated the research, performed data-analyses of DMCs and wrote the manuscript. FVN  
397 performed all bio-informatics analyses. MD assisted with field sampling. All co-authors provided  
398 comments and suggestions to the first version of the manuscript.

399 **REFERENCES**

- 400 Akalin, A., Kormaksson, M., Li, S., Garrett-Bakelman, F.E., Figueroa, M.E., Melnick, A., *et al.* (2012).  
401 methylKit: a comprehensive R package for the analysis of genome-wide DNA methylation  
402 profiles. *Genome Biol.*, 13, R87.
- 403 Alonso-Blanco, C., Andrade, J., Becker, C., Bemm, F., Bergelson, J., Borgwardt, K.M., *et al.* (2016).  
404 1,135 Genomes Reveal the Global Pattern of Polymorphism in *Arabidopsis thaliana*. *Cell*, 166,  
405 481–491.
- 406 Alonso, C., Ramos-Cruz, D. & Becker, C. (2019). The role of plant epigenetics in biotic interactions.  
407 *New Phytol.*, 221, 731–737.
- 408 Ardura, A., Zaiko, A., Morán, P., Planes, S. & Garcia-Vazquez, E. (2017). Epigenetic signatures of  
409 invasive status in populations of marine invertebrates. *Sci. Rep.*, 7, 42193.
- 410 Artemov, A. V., Mugue, N.S., Rastorguev, S.M., Zhenilo, S., Mazur, A.M., Tsygankova, S. V., *et al.*  
411 (2017). Genome-Wide DNA Methylation Profiling Reveals Epigenetic Adaptation of Stickleback  
412 to Marine and Freshwater Conditions. *Mol. Biol. Evol.*, 34, 2203–2213.
- 413 Baerwald, M.R., Meek, M.H., Stephens, M.R., Nagarajan, R.P., Goodbla, A.M., Tomalty, K.M.H., *et al.*  
414 (2016). Migration-related phenotypic divergence is associated with epigenetic modifications in  
415 rainbow trout. *Mol. Ecol.*, 25, 1785–1800.
- 416 Banta, J.A. & Richards, C.L. (2018). Quantitative epigenetics and evolution. *Heredity (Edinb.)*, 121,  
417 210–224.
- 418 Beck, J.B., Schmutz, H. & Schaal, B.A. (2007). Native range genetic variation in *Arabidopsis thaliana*  
419 is strongly geographically structured and reflects Pleistocene glacial dynamics. *Mol. Ecol.*, 17,  
420 902–915.
- 421 Bolger, A. M., Lohse, M., & Usadel, B. (2014). Trimmomatic: A flexible trimmer for Illumina Sequence

- 422 Data. *Bioinformatics*, btu170.
- 423 Brachi, B., Morris, G.P. & Borevitz, J.O. (2011). Genome-wide association studies in plants: the  
424 missing heritability is in the field. *Genome Biol.*, 12, 232.
- 425 Chinnusamy, V. & Zhu, J.-K. (2009). Epigenetic regulation of stress responses in plants. *Curr. Opin.*  
426 *Plant Biol.*, 12, 133–9.
- 427 Crisp, P.A., Ganguly, D., Eichten, S.R., Borevitz, J.O. & Pogson, B.J. (2016). Reconsidering plant  
428 memory: Intersections between stress recovery, RNA turnover, and epigenetics. *Sci. Adv.*, 2,  
429 e1501340.
- 430 Danchin, E., Pocheville, A., Rey, O., Pujol, B. & Blanchet, S. (2019). Epigenetically facilitated  
431 mutational assimilation: epigenetics as a hub within the inclusive evolutionary synthesis. *Biol.*  
432 *Rev.*, 94, 259–282.
- 433 De Kort, H., Panis, P., Janssens, S.B., Helsen, K., & Honnay, O. (2019) Pre-adaptation to climate  
434 change through topography-driven evolution of traits and their plasticity. *BioRxiv*,  
435 doi.org/10.1101/821561.
- 436 Dapp, M., Reinders, J., Bédiée, A., Balsera, C., Bucher, E., Theiler, G., *et al.* (2015). Heterosis and  
437 inbreeding depression of epigenetic Arabidopsis hybrids. *Nat. Plants*, 1, 15092.
- 438 Dixon, G., Liao, Y., Bay, L.K. & Matz, M. V. (2018). Role of gene body methylation in acclimatization  
439 and adaptation in a basal metazoan. *Proc. Natl. Acad. Sci. U. S. A.*, 115, 13342–13346.
- 440 Foust, C.M., Preite, V., Schrey, A.W., Alvarez, M., Robertson, M.H., Verhoeven, K.J.F., *et al.* (2016).  
441 Genetic and epigenetic differences associated with environmental gradients in replicate  
442 populations of two salt marsh perennials. *Mol. Ecol.*, 25, 1639–1652.
- 443 Gáspár, B., Bossdorf, O. & Durka, W. (2019). Structure, stability and ecological significance of natural  
444 epigenetic variation: a large-scale survey in *Plantago lanceolata*. *New Phytol.*, 221, 1585–1596.

- 445 Gienapp, P., Fior, S., Guillaume, F., Lasky, J.R., Sork, V.L. & Csilléry, K. (2017). Genomic Quantitative  
446 Genetics to Study Evolution in the Wild. *Trends Ecol. Evol.*, 32, 897–908.
- 447 Gugger, P.F., Fitz-Gibbon, S., PellEgrini, M. & Sork, V.L. (2016). Species-wide patterns of DNA  
448 methylation variation in *Quercus lobata* and their association with climate gradients. *Mol. Ecol.*,  
449 25, 1665–1680.
- 450 Hilker, M., Schwachtje, J., Baier, M., Balazadeh, S., Bäumle, I., Geiselhardt, S., *et al.* (2016). Priming  
451 and memory of stress responses in organisms lacking a nervous system. *Biol. Rev.*, 91, 1118–  
452 1133.
- 453 Hilmarsson, H.S., Hytönen, T., Isobe, S., Göransson, M., Toivainen, T. & Hallsson, J.H. (2017).  
454 Population genetic analysis of a global collection of *Fragaria vesca* using microsatellite markers.  
455 *PLoS One*, 12, e0183384.
- 456 Ito, H., Kim, J.-M., Matsunaga, W., Saze, H., Matsui, A., Endo, T.A., *et al.* (2016). A Stress-Activated  
457 Transposon in *Arabidopsis* Induces Transgenerational Abscisic Acid Insensitivity. *Sci. Rep.*, 6,  
458 23181.
- 459 Jeremias, G., Barbosa, J., Marques, S.M., Asselman, J., Gonçalves, F.J.M. & Pereira, J.L. (2018).  
460 Synthesizing the role of epigenetics in the response and adaptation of species to climate  
461 change in freshwater ecosystems. *Mol. Ecol.*, 27, 2790–2806.
- 462 Jiang, C., Mithani, A., Belfield, E.J., Mott, R., Hurst, L.D. & Harberd, N.P. (2014). Environmentally  
463 responsive genome-wide accumulation of de novo *Arabidopsis thaliana* mutations and  
464 epimutations. *Genome Res.*, 24, 1821–9.
- 465 Jung, S., Lee, T., Cheng, C.-H., Buble, K., Zheng, P., Yu, J., *et al.* (2019). 15 years of GDR: New data and  
466 functionality in the Genome Database for Rosaceae. *Nucleic Acids Res.*, 47, D1137–D1145.
- 467 Keller, T.E., Lasky, J.R. & Yi, S. V. (2016). The multivariate association between genomewide DNA  
468 methylation and climate across the range of *Arabidopsis thaliana*. *Mol. Ecol.*, 25, 1823–1837.

- 469 Krishna Kumar, S., Feldman, M.W., Rehkopf, D.H. & Tuljapurkar, S. (2016). Limitations of GCTA as a  
470 solution to the missing heritability problem. *Proc. Natl. Acad. Sci. U. S. A.*, 113, E61-70.
- 471 Krueger, F. & Andrews, S.R. (2011). Bismark: a flexible aligner and methylation caller for Bisulfite-Seq  
472 applications. *Bioinformatics*, 27(11),1571-2.
- 473 Latzel, V., Rendina González, A.P. & Rosenthal, J. (2016). Epigenetic Memory as a Basis for Intelligent  
474 Behavior in Clonal Plants. *Front. Plant Sci.*, 7, 1354.
- 475 Lind, M.I. & Spagopoulou, F. (2018). Evolutionary consequences of epigenetic inheritance. *Heredity*  
476 (*Edinb.*), 121, 205–209.
- 477 Mathieu, O., Reinders, J., Čaikovski, M., Smathajitt, C. & Paszkowski, J. (2007). Transgenerational  
478 Stability of the Arabidopsis Epigenome Is Coordinated by CG Methylation. *Cell*, 130, 851–862.
- 479 Mirouze, M. & Paszkowski, J. (2011). Epigenetic contribution to stress adaptation in plants. *Curr.*  
480 *Opin. Plant Biol.*, 14, 267–274.
- 481 Miska, E.A. & Ferguson-Smith, A.C. (2016). Transgenerational inheritance: Models and mechanisms  
482 of non–DNA sequence–based inheritance. *Science (80-. )*, 354, 59–63.
- 483 Nicotra, A.B., Segal, D.L., Hoyle, G.L., Schrey, A.W., Verhoeven, K.J.F. & Richards, C.L. (2015).  
484 Adaptive plasticity and epigenetic variation in response to warming in an Alpine plant. *Ecol.*  
485 *Evol.*, 5, 634–647.
- 486 Paszkowski, J. & Grossniklaus, U. (2011). Selected aspects of transgenerational epigenetic  
487 inheritance and resetting in plants. *Curr. Opin. Plant Biol.*, 14, 195–203.
- 488 Platt, A., Gugger, P.F., Pellegrini, M. & Sork, V.L. (2015). Genome-wide signature of local adaptation  
489 linked to variable CpG methylation in oak populations. *Mol. Ecol.*, 24, 3823–3830.
- 490 Proulx, S.R., Dey, S., Guzella, T. & Teotónio, H. (2019). How differing modes of non-genetic  
491 inheritance affect population viability in fluctuating environments. *Ecol. Lett.*, 22, 1767–1775.



- 492 Rendina González, A.P., Preite, V., Verhoeven, K.J.F. & Latzel, V. (2018). Transgenerational Effects  
493 and Epigenetic Memory in the Clonal Plant *Trifolium repens*. *Front. Plant Sci.*, 9, 1677.
- 494 Resende, R.T., Resende, M.D.V., Silva, F.F., Azevedo, C.F., Takahashi, E.K., Silva-Junior, O.B., *et al.*  
495 (2017). Regional heritability mapping and genome-wide association identify loci for complex  
496 growth, wood and disease resistance traits in *Eucalyptus*. *New Phytol.*, 213, 1287–1300.
- 497 Rey, O., Danchin, E., Mirouze, M., Loot, C. & Blanchet, S. (2016a). Adaptation to Global Change: A  
498 Transposable Element–Epigenetics Perspective. *Trends Ecol. Evol.*, 31, 514–526.
- 499 Rey, O., Danchin, E., Mirouze, M., Loot, C., Blanchet, S., Bijlsma, K., *et al.* (2016b). Adaptation to  
500 Global Change: A Transposable Element–Epigenetics Perspective. *Trends Ecol. Evol.*, 31, 514–  
501 526.
- 502 Richardson, J.L., Urban, M.C., Bolnick, D.I. & Skelly, D.K. (2014). Microgeographic adaptation and the  
503 spatial scale of evolution. *Trends Ecol. Evol.*, 29, 165–76.
- 504 Schmid, M.W., Heichinger, C., Coman Schmid, D., Guthörl, D., Gagliardini, V., Bruggmann, R., *et al.*  
505 (2018). Contribution of epigenetic variation to adaptation in *Arabidopsis*. *Nat. Commun.*, 9,  
506 4446.
- 507 Schrader, L. & Schmitz, J. (2019). The impact of transposable elements in adaptive evolution. *Mol.*  
508 *Ecol.*, 28, 1537–1549.
- 509 Stapley, J., Santure, A.W. & Dennis, S.R. (2015). Transposable elements as agents of rapid adaptation  
510 may explain the genetic paradox of invasive species. *Mol. Ecol.*, 24, 2241–2252.
- 511 Stassen, J.H.M., López, A., Jain, R., Pascual-Pardo, D., Luna, E., Smith, L.M., *et al.* (2018). The  
512 relationship between transgenerational acquired resistance and global DNA methylation in  
513 *Arabidopsis*. *Sci. Rep.*, 8, 14761.
- 514 Supek, F., Bošnjak, M., Škunca, N. & Šmuc, T. (2011). REVIGO Summarizes and Visualizes Long Lists of

- 515 Gene Ontology Terms. *PLoS One*, 6, e21800.
- 516 Thorson, J.L.M., Smithson, M., Beck, D., Sadler-Riggleman, I., Nilsson, E., Dybdahl, M., *et al.* (2017).  
517 Epigenetics and adaptive phenotypic variation between habitats in an asexual snail. *Sci. Rep.*, 7,  
518 14139.
- 519 Vellend, M., Cornwell, W., Magnuson-Ford, K. & Mooers, A. (2010). Measuring phylogenetic  
520 biodiversity In Magurran A., editor;, & McGill B., editor.(Eds.), Biological diversity. *Front.*  
521 *Meas. Assess.*, 197–207.
- 522 Walker, D.L., Bhagwate, A.V., Baheti, S., Smalley, R.L., Hilker, C.A., Sun, Z., *et al.* (2015). DNA  
523 methylation profiling: comparison of genome-wide sequencing methods and the Infinium  
524 Human Methylation 450 Bead Chip. *Epigenomics*, 7, 1287–1302.
- 525 Wan, Z.Y., Xia, J.H., Lin, G., Wang, L., Lin, V.C.L. & Yue, G.H. (2016). Genome-wide methylation  
526 analysis identified sexually dimorphic methylated regions in hybrid tilapia. *Sci. Rep.*, 6, 35903.
- 527 Wellenreuther, M. & Hansson, B. (2016). Detecting Polygenic Evolution: Problems, Pitfalls, and  
528 Promises. *Trends Genet.*, 32, 155–164.
- 529 Whipple, A. V & Holeski, L.M. (2016). Epigenetic Inheritance across the Landscape. *Front. Genet.*, 7,  
530 189.
- 531 Wibowo, A., Becker, C., Durr, J., Price, J., Spaepen, S., Hilton, S., *et al.* (2018). Partial maintenance of  
532 organ-specific epigenetic marks during plant asexual reproduction leads to heritable  
533 phenotypic variation. *Proc. Natl. Acad. Sci.*, 115, E9145–E9152.
- 534 Zhang, Y.-Y., Latzel, V., Fischer, M. & Bossdorf, O. (2018). Understanding the evolutionary potential  
535 of epigenetic variation: a comparison of heritable phenotypic variation in epiRILs, RILs, and  
536 natural ecotypes of *Arabidopsis thaliana*. *Heredity (Edinb.)*, 121, 257–265.
- 537
